# Supplementary material
Source: publisher site journal article supplement (https://www.spandidos-publications.com/1842/downloadSupplementary)

Figure S1. Expression of RANKL and RANK. Western blotting was used to determine the expression of RANKL and RANK in 2nd and 4th passage GCTB cells. As common markers of GCTB, RANKL was only expressed in NS cells and RANK was only expressed in multinucleated giant cells. It was demonstrated that RANK expression was weak in 2nd passage cells and disappeared in 4th passage cells, whereas RANKL expression was continuous from 2nd to 4th passage cells. So, only NS cells remained in the 4th passage generation. \*\*\* $P < 0.0001$ . RANKL, receptor activator of nuclear factor- $\kappa$ B ligand; RANK, receptor activator of nuclear factor- $\kappa$ B ligand receptor; GCTB, giant cell tumor of bone; NS, neoplastic stromal.

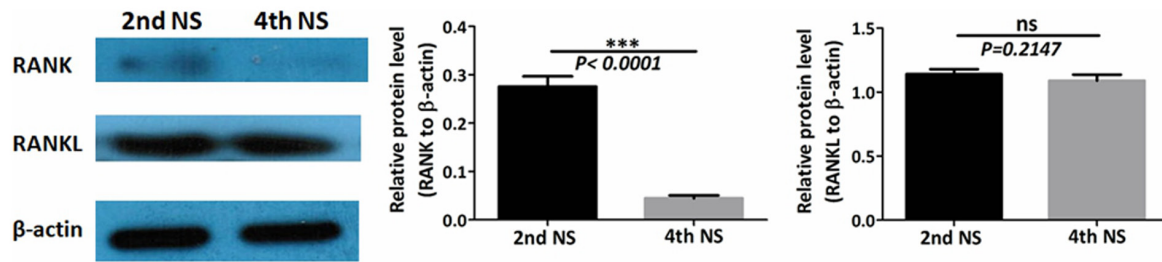

Supplement: Supplementary file 1 [file downloadSupplementary]
